# Supplementary material for: Controls on the composition of hydroxylated isoGDGTs in cultivated ammonia oxidizing Thaumarchaeota
Source: Copernicus journal article supplement (doi:10.5194/egusphere-2024-1773), 2024-06-17
Supplement: Supplementary file 1 [file egusphere-2024-1773-supplement.pdf]

## Supplementary materials to

# Controls on the composition of hydroxylated isoGDGTs in cultivated ammonia oxidizing Thaumarchaeota

Devika Varma<sup>1</sup>, Laura Villanueva<sup>1,2</sup>, Nicole J. Bale<sup>1</sup>, Pierre Offre<sup>1</sup>, Gert-Jan Reichart<sup>2,3</sup>, Stefan Schouten<sup>1,2</sup>

<sup>1</sup>Department of Marine Microbiology and Biogeochemistry, NIOZ Royal Netherlands Institute for Sea Research, Den Burg, the Netherlands

<sup>2</sup>Department of Earth Sciences, Utrecht University, Utrecht, the Netherlands

<sup>3</sup>Department of Ocean Systems, NIOZ Royal Netherlands Institute for Sea Research, Den Burg, the Netherlands

Correspondence to: Devika Varma (devika.varma@nioz.nl)

Table S1. Relative abundance of isoGDGTs and OH-isoGDGTs per headgroup from cultures of *Nitrosopumilus piranensis* D3C grown at three different temperatures and harvested at mid-exponential and stationary phases. N.D. = not detected.

### *Mid-exponential phase*

|           | OH-isoGDGT-0 | OH-isoGDGT-1 | OH-isoGDGT-2 | OH-isoGDGT-3 | OH-isoGDGT-4 | isoGDGT-0 | isoGDGT-1 | isoGDGT-2 | isoGDGT-3 | isoGDGT-4 | Crenar chaeol | Crenar chaeol isomer |
|-----------|--------------|--------------|--------------|--------------|--------------|-----------|-----------|-----------|-----------|-----------|---------------|----------------------|
| (a) 25 °C |              |              |              |              |              |           |           |           |           |           |               |                      |
| HPH       | N.D.         | N.D.         | N.D.         | N.D.         | N.D.         | 23.7      | 5.5       | 0.7       | 0.1       | 0.1       | 11.1          | N.D.                 |
| DH        | 0.6          | 3.5          | 2.9          | 0.1          | 0.0          | 2.3       | 19.4      | 29.5      | 8.7       | 6.9       | 1.3           | 0.4                  |
| MH        | 0.1          | 0.0          | N.D.         | N.D.         | N.D.         | 71.2      | 28.9      | 3.8       | 0.7       | 0.8       | 34.5          | N.D.                 |
| core      | N.D.         | N.D.         | N.D.         | N.D.         | N.D.         | 64.3      | 38.2      | 21.6      | 28.3      | 33.4      | 15.3          | N.D.                 |
| (b) 30 °C |              |              |              |              |              |           |           |           |           |           |               |                      |
| HPH       | N.D.         | N.D.         | N.D.         | N.D.         | N.D.         | 17.8      | 8.6       | 1.3       | 0.2       | 0.2       | 30.1          | N.D.                 |
| DH        | 0.3          | 1.7          | 1.8          | 0.0          | 0.0          | 1.0       | 8.4       | 19.8      | 6.2       | 13.6      | 1.0           | 0.4                  |
| MH        | N.D.         | N.D.         | N.D.         | N.D.         | N.D.         | 27.6      | 13.4      | 3.4       | 0.6       | 0.7       | 20.6          | N.D.                 |
| core      | N.D.         | N.D.         | N.D.         | N.D.         | N.D.         | 24.1      | 11.9      | 6.2       | 7.9       | 24.6      | 7.0           | N.D.                 |
| (c) 35 °C |              |              |              |              |              |           |           |           |           |           |               |                      |
| HPH       | N.D.         | N.D.         | N.D.         | N.D.         | N.D.         | 18.2      | 12.0      | 4.4       | 1.7       | 0.4       | 69.5          | N.D.                 |
| DH        | 0.2          | 1.4          | 5.5          | 0.4          | 0.4          | 0.1       | 1.2       | 7.4       | 3.8       | 17.5      | 0.7           | 0.7                  |
| MH        | N.D.         | N.D.         | N.D.         | N.D.         | N.D.         | 17.7      | 9.7       | 4.2       | 0.7       | 1.3       | 24.8          | N.D.                 |
| core      | N.D.         | N.D.         | N.D.         | N.D.         | N.D.         | 9.0       | 4.5       | 2.5       | 2.8       | 11.4      | 3.8           | N.D.                 |

### *Stationary phase*

|  | OH-isoGDGT-0 | OH-isoGDGT-1 | OH-isoGDGT-2 | OH-isoGDGT-3 | OH-isoGDGT-4 | isoGDGT-0 | isoGDGT-1 | isoGDGT-2 | isoGDGT-3 | isoGDGT-4 | Crenar chaeol | Crenar chaeol isomer |
|--|--------------|--------------|--------------|--------------|--------------|-----------|-----------|-----------|-----------|-----------|---------------|----------------------|
|--|--------------|--------------|--------------|--------------|--------------|-----------|-----------|-----------|-----------|-----------|---------------|----------------------|

|           |      |      |      |      |      |      |      |      |      |      |      |      |
|-----------|------|------|------|------|------|------|------|------|------|------|------|------|
| (a) 25 °C |      |      |      |      |      |      |      |      |      |      |      |      |
| HPH       | N.D. | N.D. | N.D. | N.D. | N.D. | 55.4 | 13.6 | 0.2  | 0.2  | 0.1  | 30.6 | N.D. |
| DH        | 0.6  | 3.7  | 3.1  | 0.1  | N.D. | 3.7  | 30.5 | 35.7 | 11.0 | 8.5  | 2.4  | 0.7  |
| MH        | 0.0  | 0.0  | 0.0  | N.D. | N.D. | 50.1 | 21.8 | 3.3  | 0.5  | 0.5  | 23.9 | N.D. |
| core      | N.D. | N.D. | N.D. | N.D. | N.D. | 27.9 | 17.3 | 10.1 | 13.5 | 21.3 | 9.8  | N.D. |
| (b) 30 °C |      |      |      |      |      |      |      |      |      |      |      |      |
| HPH       | N.D. | N.D. | N.D. | N.D. | N.D. | 33.7 | 17.3 | 3.2  | 0.5  | 0.3  | 45.0 | N.D. |
| DH        | 0.5  | 2.4  | 2.6  | 0.1  | 0.0  | 1.4  | 13.0 | 38.0 | 11.4 | 28.3 | 1.5  | 0.8  |
| MH        | N.D. | N.D. | N.D. | N.D. | N.D. | 39.3 | 22.4 | 7.3  | 1.1  | 1.6  | 28.4 | N.D. |
| core      | N.D. | N.D. | N.D. | N.D. | N.D. | 20.5 | 11.3 | 6.4  | 8.7  | 44.5 | 8.6  | N.D. |
| (c) 35 °C |      |      |      |      |      |      |      |      |      |      |      |      |
| HPH       | N.D. | N.D. | N.D. | N.D. | N.D. | 21.6 | 15.6 | 6.5  | 0.6  | 0.5  | 55.3 | N.D. |
| DH        | 0.7  | 6.0  | 21.9 | 1.6  | 2.2  | 0.2  | 2.4  | 16.7 | 8.9  | 36.0 | 1.7  | 1.6  |
| MH        | 0.0  | 0.1  | 0.2  | N.D. | N.D. | 23.1 | 16.7 | 10.6 | 1.7  | 4.1  | 43.5 | N.D. |
| core      | N.D. | N.D. | N.D. | N.D. | N.D. | 19.3 | 11.1 | 6.5  | 3.5  | 22.0 | 37.6 | N.D. |

Table S2. Relative abundance of isoGDGTs and OH-isoGDGTs per headgroup from cultures of *Nitrosopumilus adriaticus* NF5 strain grown at three different temperatures and harvested at mid-exponential and stationary phases. N.D. = not detected.

#### *Mid-exponential phase*

|           | OH-isoGDGT-0 | OH-isoGDGT-1 | OH-isoGDGT-2 | OH-isoGDGT-3 | OH-isoGDGT-4 | isoGDGT-0 | isoGDGT-1 | isoGDGT-2 | isoGDGT-3 | isoGDGT-4 | Crenarchaeol | Crenarchaeol isomer |
|-----------|--------------|--------------|--------------|--------------|--------------|-----------|-----------|-----------|-----------|-----------|--------------|---------------------|
| (a) 20 °C |              |              |              |              |              |           |           |           |           |           |              |                     |
| HPH       | 0.6          | 0.2          | N.D.         | N.D.         | N.D.         | 83.3      | 6.7       | 0.4       | 0.0       | 0.2       | 16.4         | N.D.                |
| DH        | 3.0          | 26.8         | 19.4         | 0.5          | 0.1          | 1.2       | 19.8      | 22.4      | 4.9       | 2.2       | 0.2          | 0.4                 |
| MH        | 35.4         | 6.3          | 0.6          | N.D.         | N.D.         | 32.8      | 7.6       | 1.3       | 0.1       | 0.1       | 15.1         | N.D.                |
| core      | N.D.         | N.D.         | N.D.         | N.D.         | N.D.         | 75.6      | 28.1      | 13.1      | 12.1      | 14.7      | 7.4          | N.D.                |
| (b) 25 °C |              |              |              |              |              |           |           |           |           |           |              |                     |
| HPH       | 0.6          | 0.3          | 0.0          | N.D.         | N.D.         | 71.2      | 10.8      | 0.8       | 0.1       | 0.3       | 24.0         | N.D.                |
| DH        | 2.9          | 29.9         | 37.6         | 1.1          | 0.3          | 0.6       | 9.2       | 16.2      | 5.4       | 4.1       | 0.2          | 0.5                 |
| MH        | 56.8         | 12.1         | 1.4          | N.D.         | N.D.         | 28.0      | 7.1       | 1.0       | 0.1       | 0.3       | 17.9         | N.D.                |
| core      | N.D.         | N.D.         | N.D.         | N.D.         | N.D.         | 50.1      | 18.5      | 8.4       | 9.2       | 21.0      | 4.3          | N.D.                |
| (c) 30 °C |              |              |              |              |              |           |           |           |           |           |              |                     |
| HPH       | 0.2          | 0.2          | 0.0          | N.D.         | N.D.         | 12.2      | 3.0       | 0.5       | 0.0       | 0.3       | 5.2          | N.D.                |
| DH        | 0.6          | 6.4          | 21.1         | 0.9          | 0.4          | 0.1       | 1.7       | 6.8       | 2.8       | 2.9       | 0.1          | 0.3                 |
| MH        | 17.8         | 6.2          | 1.9          | N.D.         | N.D.         | 10.5      | 3.6       | 1.0       | 0.0       | 0.1       | 13.3         | N.D.                |
| core      | N.D.         | N.D.         | N.D.         | N.D.         | N.D.         | 19.7      | 6.1       | 1.8       | 3.1       | 14.7      | 1.5          | N.D.                |

#### *Stationary phase*

|           | OH-isoGDGT-0 | OH-isoGDGT-1 | OH-isoGDGT-2 | OH-isoGDGT-3 | OH-isoGDGT-4 | isoGDGT-0 | isoGDGT-1 | isoGDGT-2 | isoGDGT-3 | isoGDGT-4 | Crenarchaeol | Crenarchaeol isomer |
|-----------|--------------|--------------|--------------|--------------|--------------|-----------|-----------|-----------|-----------|-----------|--------------|---------------------|
| (a) 20 °C |              |              |              |              |              |           |           |           |           |           |              |                     |
| HPH       | 1.6          | 0.6          | 0.1          | N.D.         | N.D.         | 64.9      | 10.7      | 0.1       | 0.1       | 0.2       | 21.9         | N.D.                |
| DH        | 4.7          | 46.9         | 33.3         | 0.9          | 0.2          | 0.1       | 2.5       | 5.5       | 3.5       | 1.8       | 0.2          | 0.3                 |

|           |      |      |      |      |      |      |      |      |     |      |      |      |
|-----------|------|------|------|------|------|------|------|------|-----|------|------|------|
| MH        | 54.9 | 9.4  | 1.0  | N.D. | N.D. | 18.1 | 4.0  | 0.6  | 0.0 | 0.1  | 12.0 | N.D. |
| core      | N.D. | N.D. | N.D. | N.D. | N.D. | 52.1 | 16.8 | 6.6  | 7.5 | 11.2 | 5.7  | N.D. |
| (b) 25 °C |      |      |      |      |      |      |      |      |     |      |      |      |
| HPH       | 0.4  | 0.2  | 0.1  | N.D. | N.D. | 58.4 | 14.7 | 2.7  | 0.2 | 0.2  | 23.1 | N.D. |
| DH        | 2.4  | 27.5 | 40.4 | 1.0  | 0.3  | 0.2  | 4.3  | 13.6 | 5.7 | 4.0  | 0.2  | 0.5  |
| MH        | 45.0 | 10.2 | 1.5  | N.D. | N.D. | 18.5 | 6.5  | 1.6  | 0.2 | 0.2  | 16.4 | N.D. |
| core      | N.D. | N.D. | N.D. | N.D. | N.D. | 42.6 | 15.8 | 8.1  | 8.1 | 20.1 | 5.4  | N.D. |
| (c) 30 °C |      |      |      |      |      |      |      |      |     |      |      |      |
| HPH       | 0.6  | 0.4  | 0.2  | N.D. | N.D. | 48.7 | 14.7 | 4.0  | 0.3 | 0.2  | 30.9 | N.D. |
| DH        | 1.2  | 13.8 | 51.5 | 2.2  | 1.0  | 0.0  | 1.5  | 12.3 | 6.7 | 8.8  | 0.2  | 0.8  |
| MH        | 32.6 | 11.5 | 3.7  | N.D. | N.D. | 17.1 | 6.6  | 2.7  | 0.3 | 0.5  | 25.2 | N.D. |
| core      | N.D. | N.D. | N.D. | N.D. | N.D. | 35.9 | 13.9 | 6.1  | 7.5 | 31.8 | 4.8  | N.D. |

Table S3. Relative abundances (%) of core isoGDGT and OH-isoGDGT lipids inferred from mass spectral response of IPLs with mean and standard deviation from three replicate cultures of *Nitrosopumilus piranensis* D3C strain and *Nitrosopumilus adriaticus* NF5 strain grown at three different temperatures and harvested at two growth phases.

*Nitrosopumilus piranensis* D3C strain

|              | 25 °C                 |                  | 30 °C                 |                  | 35 °C                 |                  |
|--------------|-----------------------|------------------|-----------------------|------------------|-----------------------|------------------|
|              | Mid-exponential phase | Stationary phase | Mid-exponential phase | Stationary phase | Mid-exponential phase | Stationary phase |
| OH-isoGDGT-0 | 0.1± 0.1              | 0.2± 0           | 0.1± 0                | 0.1± 0           | 0.1± 0.1              | 0.3± 0.1         |
| OH-isoGDGT-1 | 0.7± 0.3              | 1± 0.1           | 0.6± 0.3              | 0.5± 0.1         | 0.7± 0.6              | 2.4± 1.1         |
| OH-isoGDGT-2 | 0.6± 0.3              | 0.8± 0.2         | 0.6± 0.2              | 0.5± 0.1         | 2.4± 2.6              | 8.6± 4.8         |
| OH-isoGDGT-3 | 0± 0                  | 0± 0             | 0± 0                  | 0± 0             | 0.1± 0.2              | 0.6± 0.5         |
| OH-isoGDGT-4 | 0± 0                  | N.D.             | 0± 0                  | 0± 0             | 0.2± 0.3              | 0.8± 0.6         |
| isoGDGT-0    | 44.6± 4.7             | 38.8± 3.3        | 34.3± 1               | 31.3± 1.4        | 22.2± 3.9             | 14.3± 0.3        |

|                     |           |           |           |           |           |           |
|---------------------|-----------|-----------|-----------|-----------|-----------|-----------|
| isoGDGT-1           | 20.1± 2.1 | 23.1± 1.1 | 19.2± 1.1 | 20.1± 1.4 | 13± 1.8   | 10.8± 1   |
| isoGDGT-2           | 7.8± 2.8  | 11.2± 2   | 10.4± 1   | 13.2± 1.3 | 10.1± 0.3 | 12.3± 3.1 |
| isoGDGT-3           | 2.4± 0.8  | 3.2± 1.1  | 2.9± 0.3  | 3.2± 0.8  | 3.3± 0.6  | 4.3± 0.3  |
| isoGDGT-4           | 2.3± 0.6  | 2.8± 0.9  | 5.8± 0.6  | 7.7± 2    | 12.1± 4.1 | 16.3± 2.9 |
| Crenarchaeol        | 21.3± 2.1 | 18.8± 0.6 | 26.1± 3.6 | 23.2± 2.2 | 35.4± 2.8 | 28.7± 0.2 |
| Crenarchaeol isomer | 0.1± 0    | 0.2± 0.1  | 0.1± 0    | 0.1± 0.1  | 0.3± 0.3  | 0.6± 0.1  |

*Nitrosopumilus adriaticus* NF5 strain

|           | 20 °C                 |                  | 25 °C                 |                  | 30 °C                 |                  |
|-----------|-----------------------|------------------|-----------------------|------------------|-----------------------|------------------|
|           | Mid-exponential phase | Stationary phase | Mid-exponential phase | Stationary phase | Mid-exponential phase | Stationary phase |
| OH-       | 3.1± 0.7              | 5.7± 1.2         | 4.2± 1.4              | 3.2± 0.6         | 3.3± 0.8              | 2.4± 0.6         |
| isoGDGT-0 |                       |                  |                       |                  |                       |                  |
| OH-       | 15.3± 3.7             | 29.4± 6.2        | 17.5± 4.8             | 15.9± 2.3        | 12.2± 1.9             | 9.5± 1.4         |
| isoGDGT-1 |                       |                  |                       |                  |                       |                  |
| OH-       | 11± 1.3               | 20.6± 4.6        | 21.6± 6.1             | 22.7± 3.3        | 37.3± 4.9             | 33.3± 4.6        |
| isoGDGT-2 |                       |                  |                       |                  |                       |                  |
| OH-       | 0.3± 0                | 0.6± 0.1         | 0.6± 0.1              | 0.5± 0.1         | 1.5± 0.1              | 1.5± 0.3         |
| isoGDGT-3 |                       |                  |                       |                  |                       |                  |
| OH-       | 0± 0                  | 0.1± 0           | 0.2± 0                | 0.1± 0           | 0.6± 0                | 0.7± 0.1         |
| isoGDGT-4 |                       |                  |                       |                  |                       |                  |
| isoGDGT-0 | 31.8± 2.8             | 23.4± 7          | 24.9± 8.5             | 24.6± 2.9        | 11± 4.5               | 16.4± 3.2        |
| isoGDGT-1 | 14.2± 2.1             | 5.5± 1.3         | 8.7± 0.8              | 8.5± 0.9         | 5.9± 0.8              | 6.1± 0.8         |
| isoGDGT-2 | 13.2± 3.6             | 4± 0.8           | 9.1± 1.3              | 8.6± 1.6         | 12.2± 1.2             | 8.8± 1.1         |

|                     |          |          |          |          |          |           |
|---------------------|----------|----------|----------|----------|----------|-----------|
| isoGDGT-3           | 2.9± 0.4 | 2.2± 0.2 | 2.9± 0.3 | 3.2± 0.5 | 4.6± 0.3 | 4.2± 0.2  |
| isoGDGT-4           | 1.4± 0.2 | 1.2± 0.1 | 2.3± 0.1 | 2.3± 0.4 | 5.4± 0.5 | 5.5± 0.4  |
| Crenarchaeol        | 6.7± 1.6 | 7.3± 4.7 | 7.8± 4.3 | 10± 2.9  | 5.5± 2   | 11.2± 2.3 |
| Crenarchaeol isomer | 0.3± 0   | 0.2± 0   | 0.2± 0   | 0.3± 0.1 | 0.4± 0.1 | 0.5± 0.1  |

Table S4. Relative abundance based on total ion current intensity of different headgroups from the IPLs of isoGDGTs and OH-isoGDGTs with mean and standard deviation from three replicate cultures of *Nitrosopumilus piranensis* D3C strain and *Nitrosopumilus adriaticus* NF5 strain grown at three different temperatures and harvested at two growth phases. Core lipids without any headgroup are indicated by core isoGDGTs. N.D. = not detected.

*Nitrosopumilus piranensis* D3C strain

|                 | 25 °C                 |                  | 30 °C                 |                  | 35 °C                 |                  |
|-----------------|-----------------------|------------------|-----------------------|------------------|-----------------------|------------------|
|                 | Mid-exponential phase | Stationary phase | Mid-exponential phase | Stationary phase | Mid-exponential phase | Stationary phase |
| HPH-OH-isoGDGTs | N.D.                  | N.D.             | N.D.                  | N.D.             | N.D.                  | N.D.             |
| DH-OH-isoGDGTs  | 1.4± 0.6              | 2± 0.3           | 1.3± 0.5              | 1.1± 0.2         | 3.5± 3.7              | 12.5± 7          |
| MH-OH-isoGDGTs  | 0± 0                  | 0± 0             | N.D.                  | N.D.             | N.D.                  | 0.1± 0.1         |
| HPH-isoGDGTs    | 2.5± 2.6              | 9.2± 9.1         | 2.8± 2.3              | 3.6± 2.7         | 8.2± 12.6             | 7± 1.2           |
| DH-isoGDGTs     | 12.3± 6.5             | 22.6± 7.6        | 15.2± 2.5             | 18.3± 7          | 18.2± 6.7             | 25.2± 6.5        |
| MH-isoGDGTs     | 80.3± 9               | 64.3± 15.8       | 77.8± 4.5             | 74.8± 9.8        | 66.8± 21.7            | 51.3± 0.5        |
| core isoGDGTs   | 3.5± 0.5              | 1.9± 0.6         | 2.9± 0.2              | 2.2± 0.2         | 3.2± 1.2              | 3.9± 0.8         |

*Nitrosopumilus adriaticus* NF5 strain

|                 | 20 °C                 |                  | 25 °C                 |                  | 30 °C                 |                  |
|-----------------|-----------------------|------------------|-----------------------|------------------|-----------------------|------------------|
|                 | Mid-exponential phase | Stationary phase | Mid-exponential phase | Stationary phase | Mid-exponential phase | Stationary phase |
| HPH-OH-isoGDGTs | 0.3± 0.1              | 0.8± 0.2         | 0.3± 0.1              | 0.3± 0           | 0.2± 0.1              | 0.4± 0           |
| DH-OH-isoGDGTs  | 27.9± 5.1             | 53± 11.3         | 40.8± 11.2            | 40.1± 5.8        | 51.7± 6.9             | 44.9± 6.4        |
| MH-OH-isoGDGTs  | 1.5± 0.2              | 2.5± 0.6         | 2.9± 1.4              | 2.1± 0.6         | 3± 0.9                | 2± 0.5           |
| HPH-isoGDGTs    | 38.3± 4.7             | 33± 13.6         | 33.8± 15.7            | 40.1± 7.7        | 16.3± 8.6             | 31.7± 7          |
| DH-isoGDGTs     | 29.6± 6.2             | 9± 2.1           | 19.5± 2.6             | 15.5± 3          | 24.6± 2.2             | 18.2± 1.6        |
| MH-isoGDGTs     | 2± 0.1                | 1.4± 0.4         | 2.2± 0.9              | 1.6± 0.4         | 3.4± 1                | 2.1± 0.5         |
| core isoGDGTs   | 0.4± 0                | 0.3± 0.1         | 0.4± 0.2              | 0.4± 0.1         | 0.8± 0.2              | 0.6± 0.1         |

Table S5. Occurrence of OH-isoGDGTs (+ = presence, - = absence) in thaumarchaeotal cultures studied for OH-isoGDGTs. Empty cells denote where information was not available.

| Order                                  | Genus & Species                                   | Organism type                         | Growth temperatures reported (°C) | Optimum growth temperature (°C) | OH-isoGDGT detection | OH-isoGDGT core lipids | OH-isoGDGT IPLs | References                                            |
|----------------------------------------|---------------------------------------------------|---------------------------------------|-----------------------------------|---------------------------------|----------------------|------------------------|-----------------|-------------------------------------------------------|
| <i>Nitrosopumilales</i>                | <i>Nitrosopumilus sp.</i> AR                      | Marine mesophile                      | 25                                | 25                              | +                    | OH-0 to OH-1           | DH              | Pitcher et al. (2011); Sinninghe Damsté et al. (2012) |
|                                        | <i>Nitrosopumilus sp.</i> SJ                      | Marine mesophile                      | 25                                | 25                              | +                    | OH-0 to OH-2           | DH              | Pitcher et al. (2011); Sinninghe Damsté et al. (2012) |
|                                        | <i>Nitrosopumilus adriaticus</i> NF5              | Marine mesophile                      | 30                                | 30                              | +                    | OH-0 to OH-5           | DH, MH          | Elling et al. (2017)                                  |
|                                        | <i>Nitrosopumilus piranensis</i> D3C              | Marine mesophile                      | 30                                | 32                              | +                    | OH-0 to OH-5           | DH, MH          | Elling et al. (2017)                                  |
|                                        | <i>Nitrosopumilus maritimus</i> SCM1              | Marine mesophile                      | 15, 20, 22, 25, 28, 30, 33, 35    | 28                              | +                    | OH-0 to OH-5           | DH, MH          | Elling et al. (2015, 2017)                            |
|                                        | <i>Ca.</i> <i>Nitrosopumilus</i> strain NAOA2     | Marine mesophile                      | 18, 22, 28, 35                    | 28                              | +                    | OH-0 to OH-4           | DH, MH          | Elling et al. (2015, 2017)                            |
|                                        | <i>Ca.</i> <i>Nitrosopumilus</i> strain NAOA6     | Marine mesophile                      | 18, 22, 28                        | 28                              | +                    | OH-0 to OH-5           | DH, MH          | Elling et al. (2015, 2017)                            |
|                                        | <i>Ca.</i> <i>Nitrosarchaeum limnium</i> SFB1     | Marine mesophile                      | 22                                | 22                              | +                    |                        | DH              | Pitcher et al. (2011); Sinninghe Damsté et al. (2012) |
|                                        | <i>Nitrosarchaeum koreense</i> MY1                | Soil mesophile                        | 25                                | 25                              | +                    | OH-0 to OH-2           | DH              | Sinninghe Damsté et al. (2012)                        |
|                                        | <i>Ca.</i> <i>Nitrosotenuis uzonensis</i> N4      | Terrestrial thermophile               | 37, 46, 50                        | 46                              | -                    | -                      | -               | Bale et al. (2019)                                    |
|                                        | <i>Ca.</i> <i>Nitrosotenuis chungbukensis</i> MY2 | Soil mesophile                        | 25                                | 30                              | +                    |                        |                 | Bale et al. (2019)                                    |
|                                        | <i>Ca.</i> <i>Nitrosotalea devanaterre</i> Nd1    | Soil acidophilic mesophile            | 25                                | 25                              | +                    | OH-0 to OH-3           | DH, MH          | Elling et al. (2017)                                  |
|                                        | <i>Ca.</i> <i>Nitrososphaera gargensis</i> Ga9.2  | Terrestrial thermophile               | 35, 46                            | 46                              | -                    | -                      | -               | Elling et al. (2017)                                  |
|                                        | <i>Nitrososphaerales</i>                          | <i>Nitrososphaera viennensis</i> EN76 | Soil mesophile                    | 37                              | 37                   | -                      | -               | -                                                     |
| <i>Nitrososphaera viennensis</i> EN123 |                                                   | Soil mesophile                        | 37                                | 37                              | -                    | -                      | -               | Elling et al. (2017)                                  |

|                            |                                               |                         |            |    |   |              |             |                                |
|----------------------------|-----------------------------------------------|-------------------------|------------|----|---|--------------|-------------|--------------------------------|
|                            | <i>Ca. Nitrososphaera</i> strain JG1          | Soil mesophile          | 37         | 37 | - | -            | -           | Sinninghe Damsté et al. (2012) |
|                            | <i>Ca. Nitrososcosmicus oleophius</i> MY3     | Terrestrial mesophile   | 30         | 30 | + |              |             | Bale et al. (2019)             |
| <i>Ca. Nitrosocaldales</i> | <i>Ca. Nitrosocaldus yellowstonensis</i> HL72 | Terrestrial thermophile | 72         | 72 | - | -            | -           | Elling et al. (2017)           |
| <i>Nitrosopumilales</i>    | <i>Nitrosopumilus adriaticus</i> NF5          | Marine mesophile        | 20, 25, 30 | 30 | + | OH-0 to OH-4 | DH, MH, HPH | This study                     |
|                            | <i>Nitrosopumilus piranensis</i> D3C          | Marine mesophile        | 25, 30, 35 | 32 | + | OH-0 to OH-4 | DH, MH      | This study                     |

---



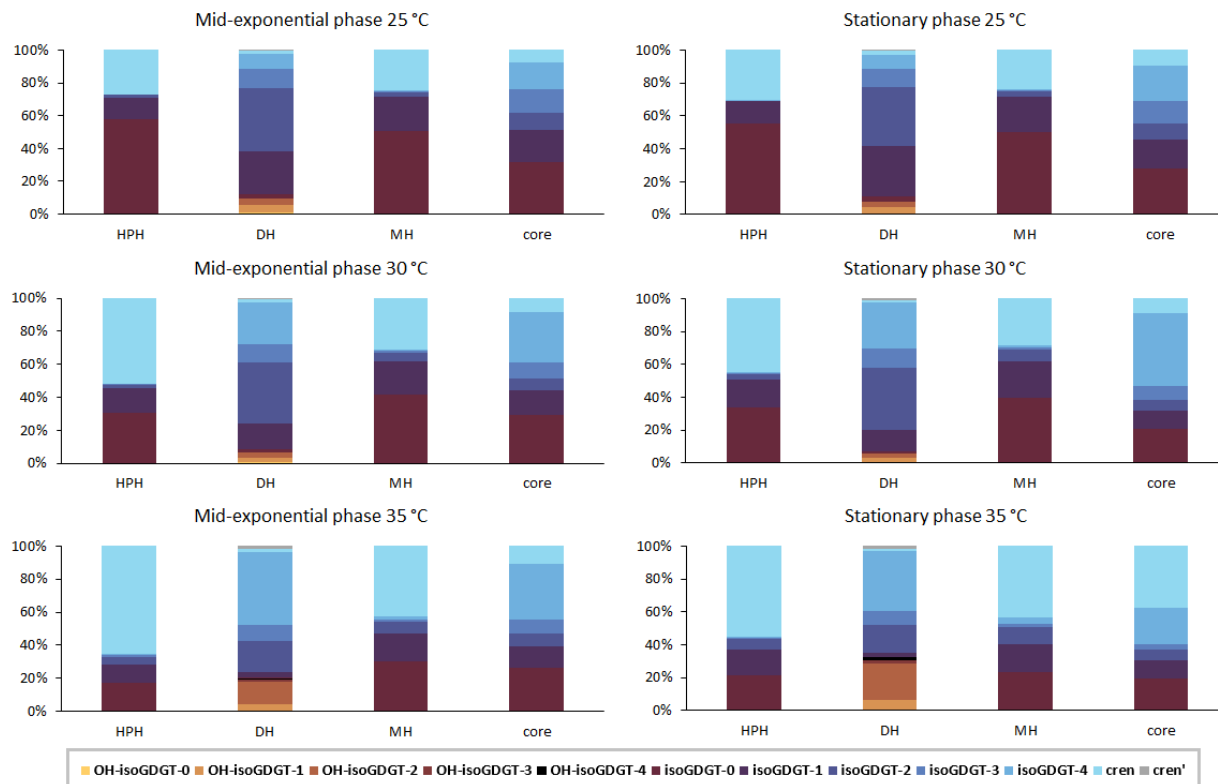

Figure S1. Relative abundance of isoGDGTs and OH-isoGDGTs per headgroup from *Nitrosopumilus piranensis* D3C strain grown at 25, 30 and 35 °C and harvested at mid-exponential and stationary phases.

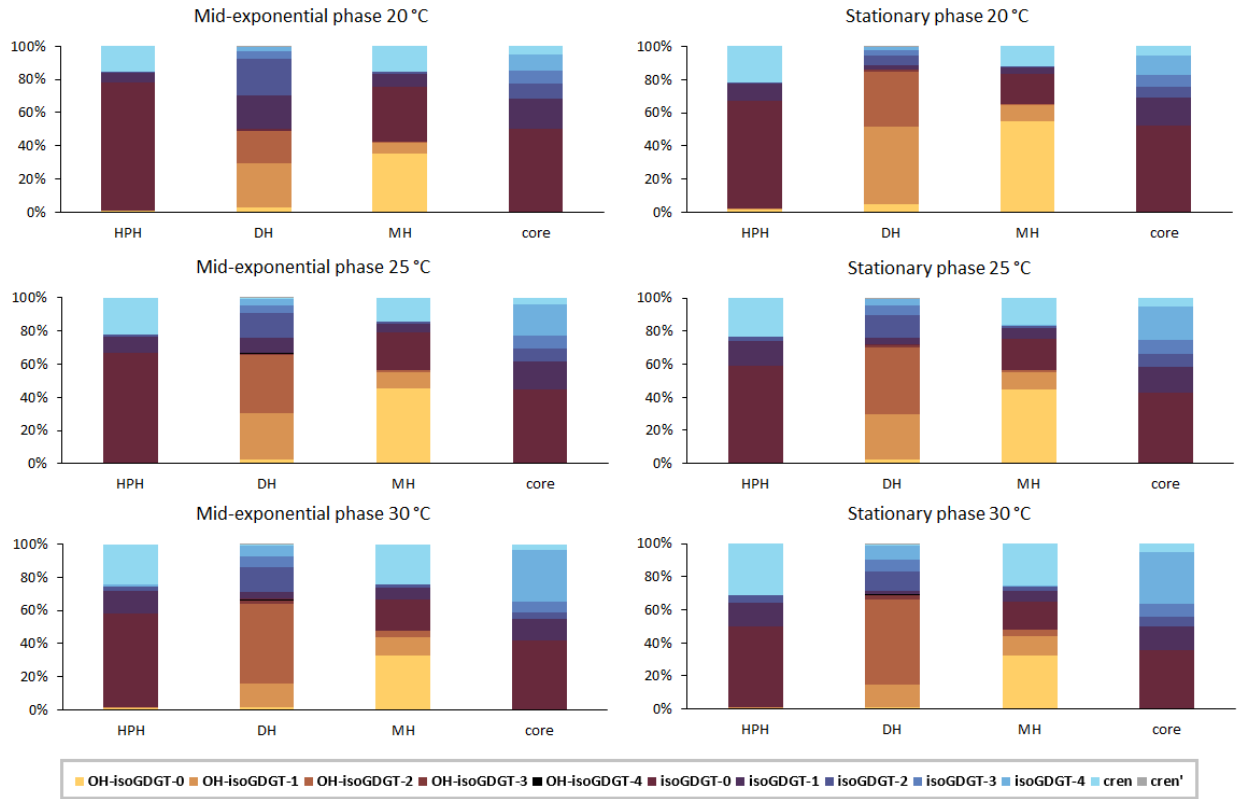

Figure S2. Relative abundance of isoGDGTs and OH-isoGDGTs per headgroup from *Nitrosopumilus adriaticus* NF5 strain grown at 20, 25 and 30 °C and harvested at mid-exponential and stationary phases.

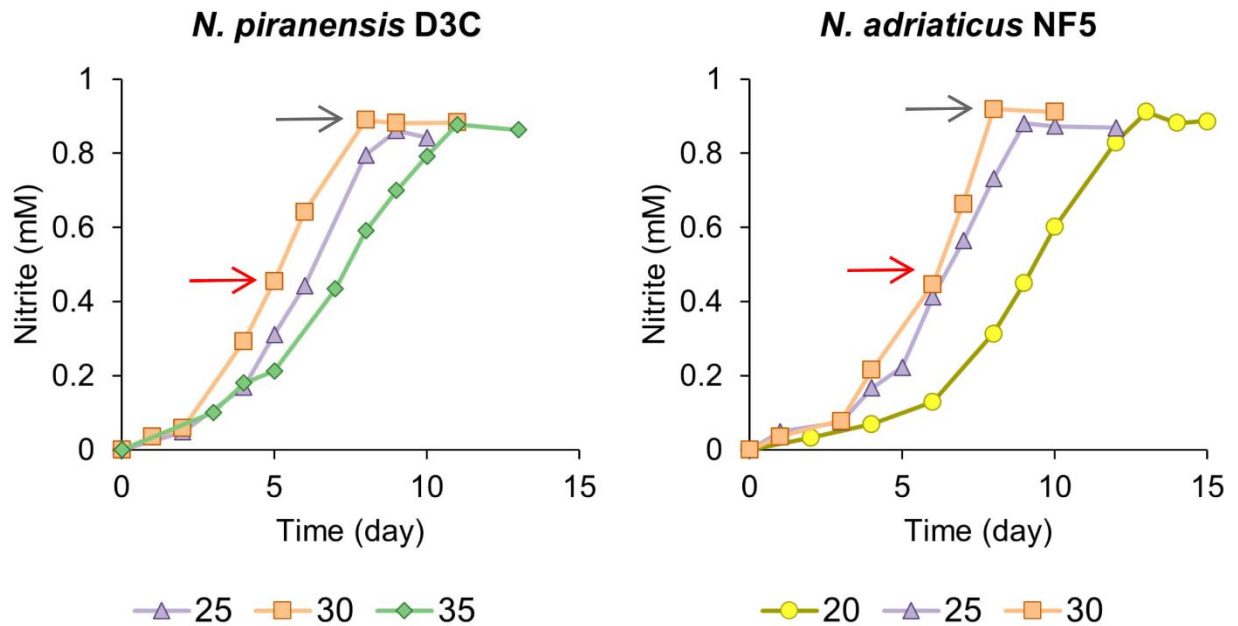

Figure S3. Nitrite production by cultures of *Nitrosopumilus piranensis* D3C strain and *Nitrosopumilus adriaticus* NF5 strain grown at different temperatures between 20 and 35 °C and harvested at mid-exponential phase as indicated by red arrows and stationary phase as indicated by grey arrows.

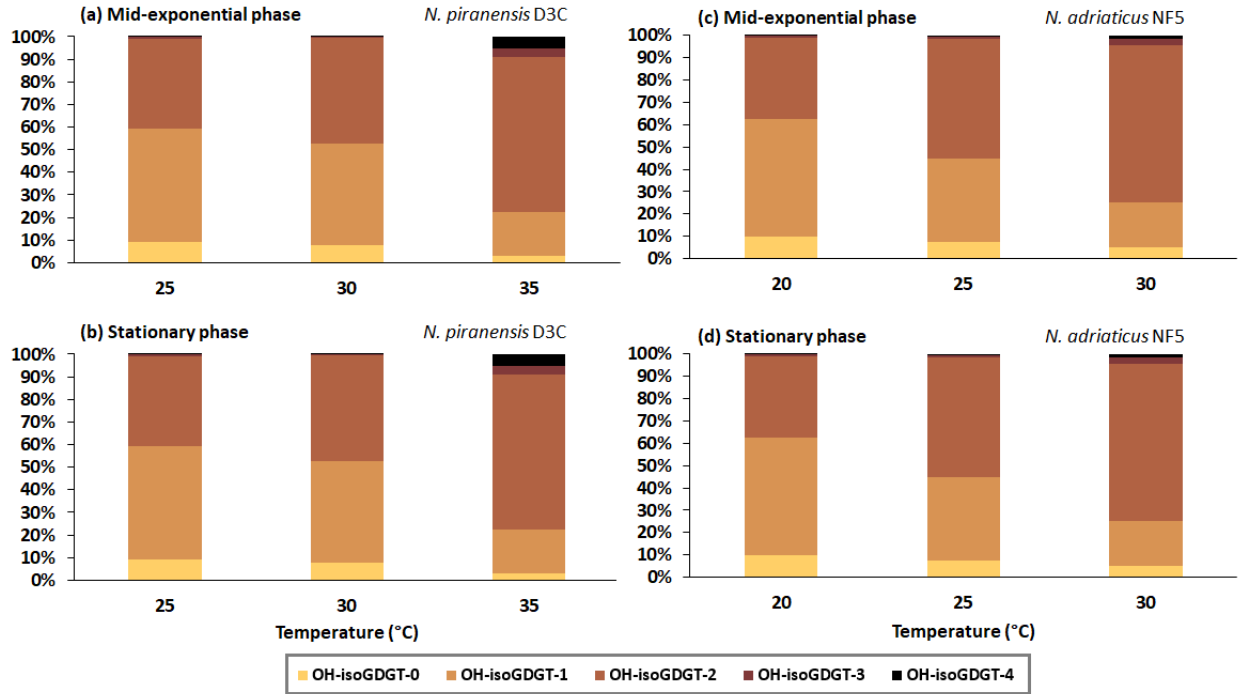

Figure S4. Core lipid composition from IPLs of OH-isoGDGTs from (a, b) *Nitrosopumilus piranensis* D3C strain and (c, d) *Nitrosopumilus adriaticus* NF5 strain grown at different temperatures and harvested at mid-exponential phase and stationary phase.

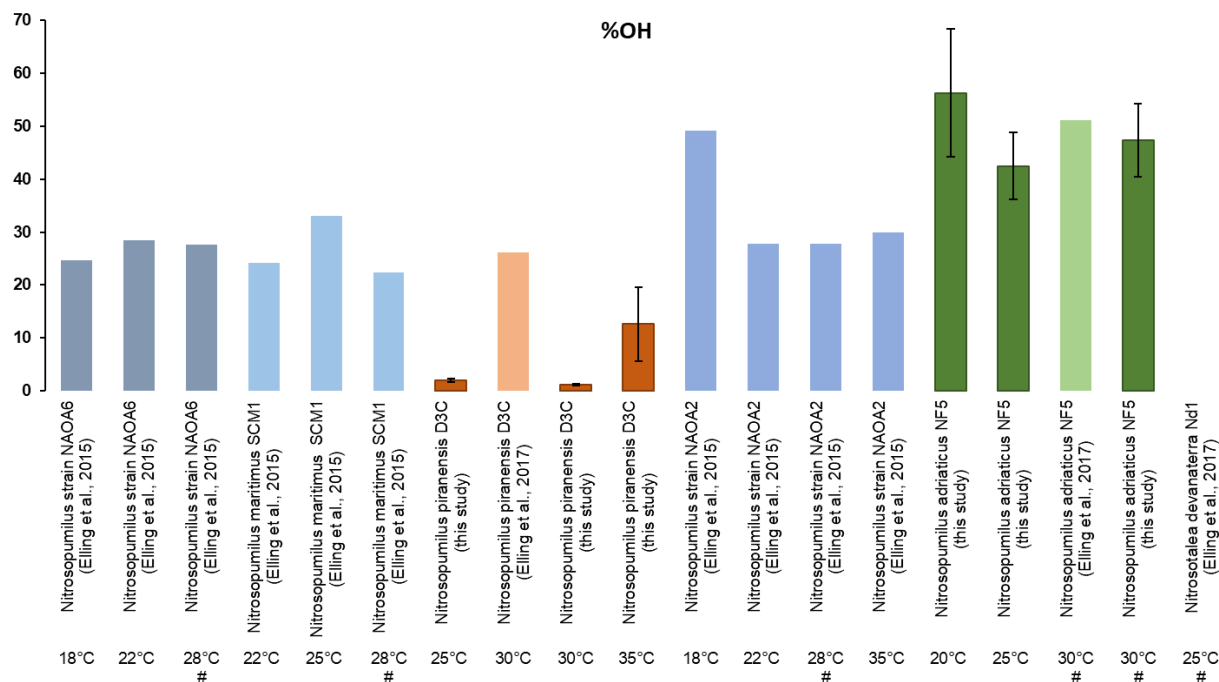

Figure S5. Relative abundance of OH-isoGDGTs relative to all isoGDGTs plus OH-isoGDGTs inferred from the IPLs of different cultures of Thaumarchaeota grown at different temperatures and harvested at stationary phase. Values from previous studies (Elling et al., 2015, 2017) were calculated according to IPL data reported. The optimal temperature of each strain is denoted by #. Error bars denote standard deviation for the triplicates used in this study. The bars were rearranged from Figure 4 according to more closely related strains (see phylogenetic analysis based on the 16S rRNA gene in Elling et al., 2017).

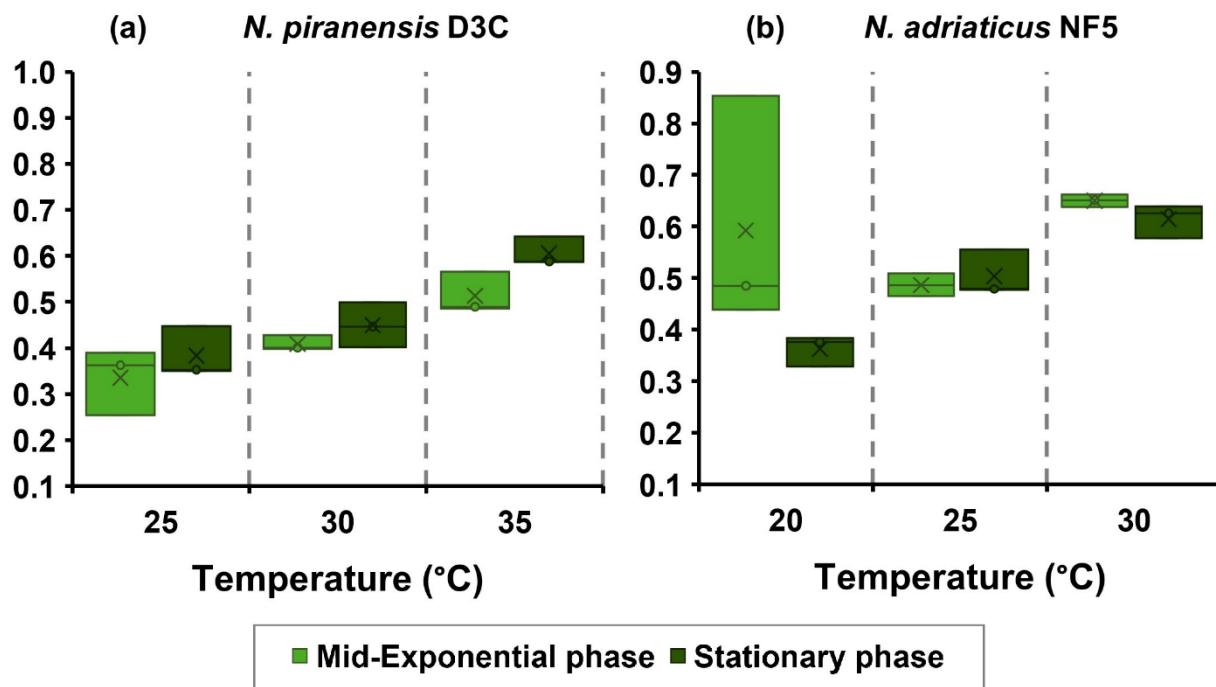

Figure S6. TEX<sub>86</sub><sup>OH</sup> index with temperature calculated from IPLs of (a) *Nitrosopumilus piranensis* D3C strain and (b) *Nitrosopumilus adriaticus* NF5 strain, harvested at mid-exponential and stationary phases.

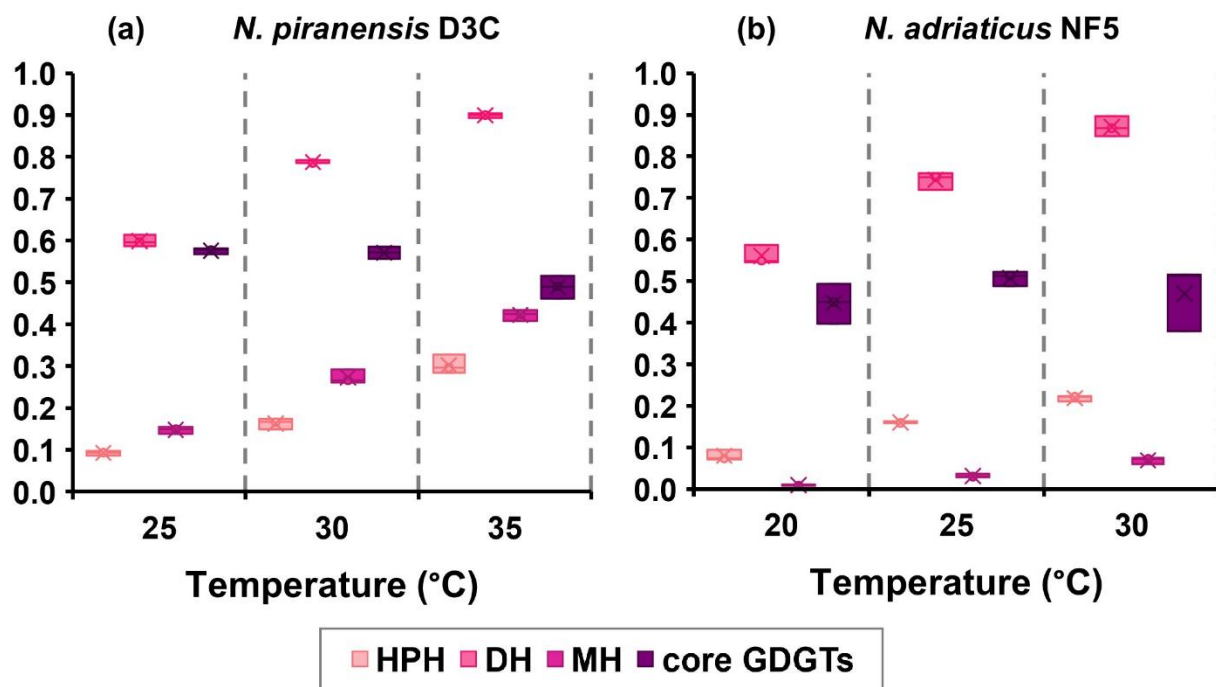

Figure S7.  $\text{TEX}_{86}^{\text{OH}}$  index with temperature calculated for different headgroups of IPLs from (a) *Nitrosopumilus piranensis* D3C strain and (b) *Nitrosopumilus adriaticus* NF5 strain, harvested at stationary phase.
